# Supplementary material for: Affecting Pseudomonas aeruginosa Phenotypic Plasticity by Quorum Sensing Dysregulation Hampers Pathogenicity in Murine Chronic Lung Infection
Source: PubMed Central journal article supplement (PMC4242533; doi:10.1371/journal.pone.0112105), 2014-11-24
Supplement: pone.0112105.s001.pdf [file pone.0112105.s001.pdf]

# Affecting *Pseudomonas aeruginosa* phenotypic plasticity by quorum sensing dysregulation hampers pathogenicity in murine chronic lung infection

Roslen Bondí, Marco Messina, Ida De Fino, Alessandra Bragonzi, Giordano Rampioni, Livia Leoni

## SUPPORTING INFORMATION

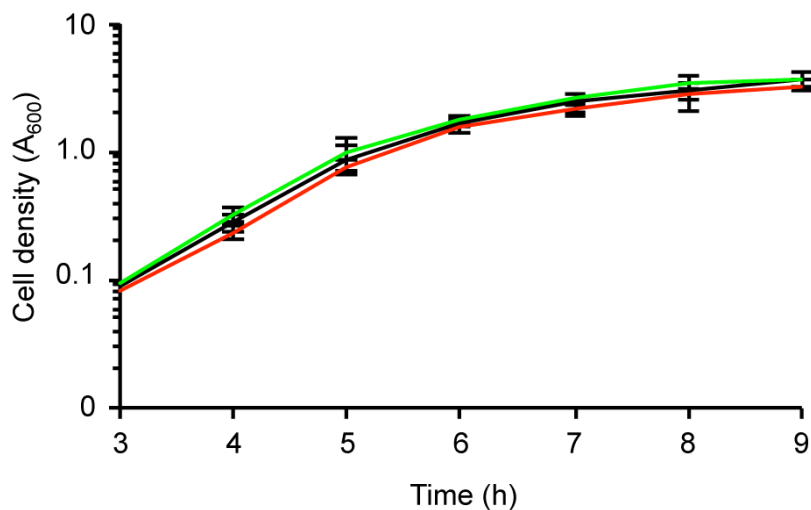

**Figure S1. Growth curve of *P. aeruginosa* PAO1 wild type, *qteE* and *rsaL* strains.** Cell density measured in *P. aeruginosa* PAO1 wild type (black line), *qteE* (red line) and *rsaL* strains (green line). Values are the means ( $\pm$  standard deviations) of at least three independent experiments. The pBBR1MCS-5 or pQteE (pBBR1MCS-5-derived) plasmids did not affect the growth curves (data not shown).

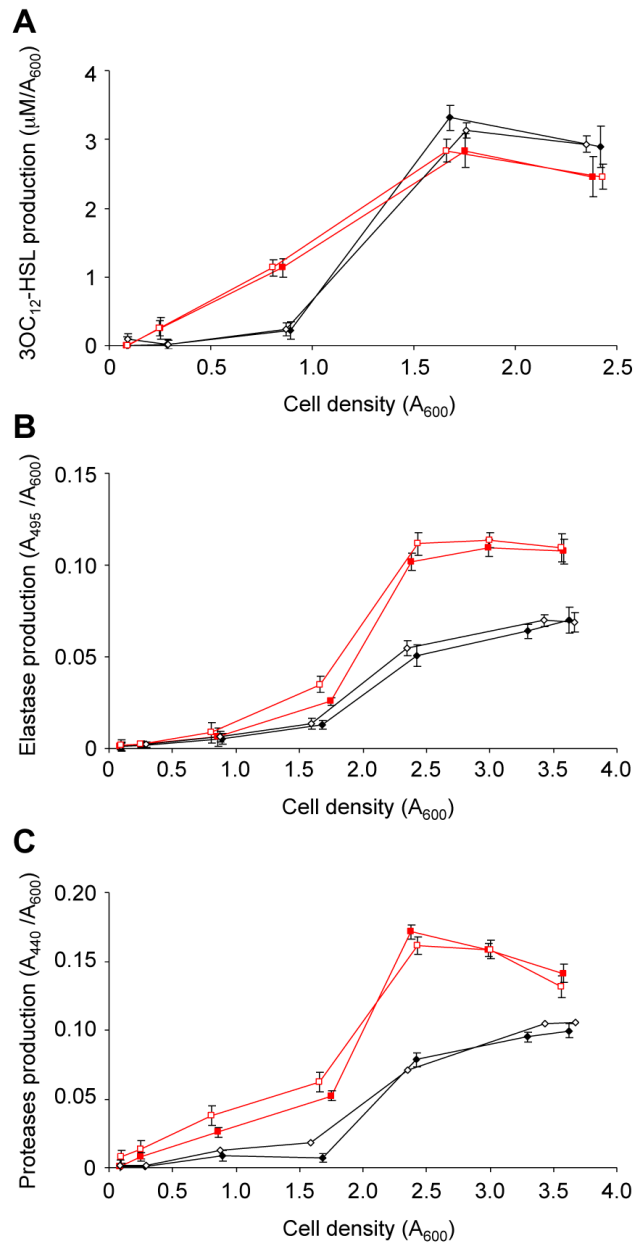

**Figure S2. The presence of pBBR1MCS-5 vector does not affect virulence-related phenotypes in *P. aeruginosa*.**

Levels of (A) 3OC<sub>12</sub>-HSL, (B) elastase, (C) proteases produced along growth by *P. aeruginosa* wild type (black lines) and *qteE* (red lines) strains containing or not the pBBR1MCS-5 empty vector (full and open circles, respectively). Values are the means ( $\pm$  standard deviations) of at least three independent experiments.

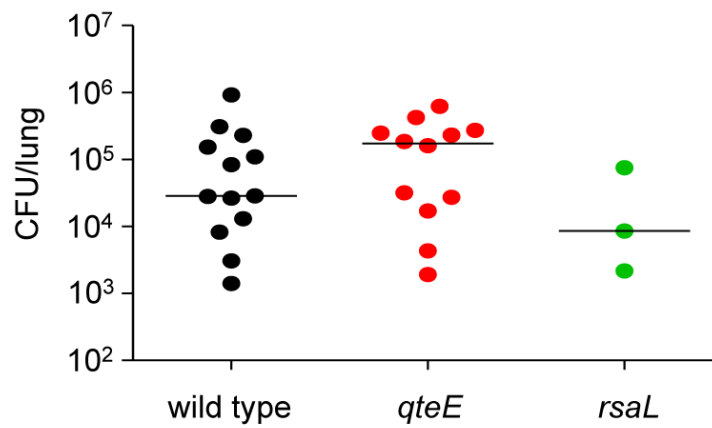

**Figure S3. Bacterial load in the lungs of mice infected with *P. aeruginosa*.**

Colony-forming units (CFU) per lung were counted after 14 days from challenge. Black full circles, wild type; red full circles, *qteE* mutant; green full circles, *rsaL* mutant. No statistically significant differences between groups were observed ( $0.19 \leq p \leq 0.67$ ; unpaired two-tailed *t* test).
